# Supplementary material
Source: PubMed Central journal article supplement (PMC6057834)
Supplement: NIHMS974538-supplement-esi.pdf [file NIHMS974538-supplement-esi.pdf]

1 **NemaFlex: A microfluidics-based technology for standardized measurement of**  
2 **muscular strength of *C. elegans***

3 Mizanur Rahman,<sup>a</sup> Jennifer E. Hewitt,<sup>a</sup> Frank Van-Bussel<sup>b</sup>, Hunter Edwards<sup>a</sup>, Jerzy Blawdziewicz<sup>b</sup>, Nathaniel J.  
4 Szewczyk<sup>c</sup>, Monica Driscoll<sup>d</sup> and Siva A. Vanapalli\*<sup>a</sup>

5 <sup>a</sup> Department of Chemical Engineering, Texas Tech University, Lubbock, TX 79409, USA. E-mail:  
6 siva.vanapalli@ttu.edu

7 <sup>b</sup> Department of Mechanical Engineering, Texas Tech University, Lubbock, TX 79409, USA. E-mail:  
8 jerzy.blawdziewicz@ttu.edu

9 <sup>c</sup>MRC/Arthritis Research UK Centre for Musculoskeletal Ageing Research, University of Nottingham, Derby DE22  
10 3DT, UK. E-mail: nathaniel.szewczyk@nottingham.ac.uk

11 <sup>d</sup>Department of Molecular Biology and Biochemistry, Rutgers University, Piscataway, NJ 08854, USA. E-mail:  
12 driscoll@dls.rutgers.edu

13

14 **Electronic Supplementary Information (ESI)**

15 Supplementary Materials is uploaded as a separate file. List of the items are

16 Supplementary Note 1. Image processing for measurement of pillar displacements.

17 Supplementary Note 2. Validity of the force-deflection expression.

18 Supplementary Note 3. Design considerations for the micropillar arena.

19 Supplementary Note 4: Average force value does not reliably capture *C. elegans* muscle  
20 strength.

21

22 Supplementary Figure.1. Work flow of pillar tracking algorithm.

23 Supplementary Figure 2. Wall effects on estimating strength measures.

24 Supplementary Figure 3. Suitability of Timoshenko beam deflection theory to estimate pillar  
25 forces.

26 Supplementary Figure 4. Average force value does not reliably capture *C. elegans* muscle  
27 strength.

28 Supplementary Figure 5. Size distribution of synchronized (young adult) wild-type population.

29

30 Supplementary Table 1. Estimates of default pillar deflection and forces due to the nematode  
31 body size being greater than the gap between pillars.

32 Supplementary Table 2. Previous studies of the influence of pillar arena/geometry on *C. elegans*  
33 locomotive behavior and force generation.

34 **Supplementary Video 1: Tracking of pillar deflections using NemaFlex software.** A crawling *C.*  
35 *elegans* deflects pillars as it navigates through the pillar arena (confinement >1 in this example).  
36 Each deflected pillar is tracked individually during the entire period of its deflection by fitting a  
37 circle on the pillar projection. Blue circles represent the undeflected location of a pillar and the  
38 red circles represent the deformed pillars due to active pushing by the nematode. The movie  
39 plays at a speed of 10 fps.

40 **Supplementary Video 2: Illustration of pillar deflection measurement.** Post-processed and  
41 assembled movie showing high resolution fitting of pillar deflections. Momentary touching of  
42 the pillars by the worm is also picked up by the software indicating the high fidelity in tracking  
43 pillar displacements. The movie plays at a speed of 10 fps.

44 **Supplementary Video 3: Response in applied force on pillars by a nematode in varying degree  
45 of confinement.** Worm movement and interaction with pillars in (a) arena A1 (confinement =  
46 0.70) and (b) arena A3 (confinement = 1.1, same worm). As the confinement increases from  
47 A1→A3, the worm pushes the pillars harder to make its way through, causing larger maximal  
48 forces (in this case in arena A3). The movie plays at a speed of 6 fps.

49 **Supplementary Video 4: Changes in the size and behavior of a nematode in response to  
50 acetylcholine agonist levamisole.** (a) A typical crawling episode of a worm in NemaFlex in  
51 absence of levamisole (confinement > 1.1). (b) The same worm undergoes a length contraction  
52 by approximately 11% and exhibits mostly reverse crawling under the influence of levamisole.  
53 The dosage used here is sub-lethal. The movie plays at a speed of 6 fps

#### 54 **NemaFlex software**

55 The NemaFlex software package that contains the MATLAB script files, custom-written routines,  
56 spreadsheet for calculating pillar stiffness, standard operating procedure for running the codes,  
57 and sample movies are provided at this link:

58 <https://www.dropbox.com/sh/buxcuuks33almjq/AAB5TYXEQszdv8Za5xx8yjYka?dl=0>

59

60

61

62

63

64

65

66

67

68

69

70

71

## 72 **Supplementary Note 1: Image processing for measurement of pillar displacements**

73 The overall procedure for tracking pillar deflections involves the following steps

74 **(Supplementary Figure 1):** (i) standard image preprocessing. In this step, worms are isolated  
75 from the image as the foreground and pillars are retained in the background. (ii) Generation of  
76 mask. The mask is generated from foreground image and is used to mask out the untouched  
77 pillars. (iii) Object tracking for image objects (worm, pillar and other objects). (iv) Pillar array  
78 (grid) identification and grid verification. In this step, pillars are identified using circular Hough  
79 transform (CHT) and verified for their grid location. (v) Determination of pillar base location and  
80 radius when the pillar is not touched by the worm and (vi) deflection measurements with  
81 reference to the pillar base location.

82 (i) *Image preprocessing:* A median filter is applied to each image (main text **Fig. 2a**) to eliminate  
83 the outlier pixels. A standard thresholding technique (Otsu's method) is used to calculate the  
84 threshold to obtain the foreground and background images<sup>1</sup>. The maximum pixel value (i.e.  
85 brightest) at each pixel location across all frames provides the background image. Likewise, the  
86 minimum pixel value (i.e. darkest) at each pixel location yields the foreground image. As shown  
87 in **Fig. 2b** (main text), these operations make the worm's entire trajectory visible in the  
88 foreground image and absent from the background image. The background contains mostly  
89 pillars (see main text **Fig. 2c**) and extraneous objects not part of the worm's trajectory.

90 (ii) *Mask generation and identification of interacting pillars:* The standard image processing  
91 technique of background subtraction cannot be used to identify the interacting pillars because  
92 they are in the background. Moreover, many pillars are never touched by the worm in the  
93 entire movie and tracking all of them will be computationally expensive. In order to avert  
94 background subtraction and isolate only the deflected pillars, a "mask" is created, which as  
95 shown in main text **Fig. 2d** contains the worm trajectory with contiguous pillars only. This mask  
96 is generated by segmenting the foreground using the threshold and regionprops operations. As  
97 the worm trajectory is the largest object in foreground, keeping the largest object by area in the  
98 mask will retain the regions where the worm is interacting with the pillars and eliminates the  
99 untouched pillars. The circles on the mask are then filled and dilated.

100 (iii) *Tracking of objects:* Once the mask is generated from the entire image stack, we apply it to  
101 each of the video frames and determine contiguous objects (main text **Fig. 2f**) using  
102 regionprops function based on the nearest neighbor algorithm<sup>2</sup>. Taking all the contiguous  
103 objects identified, we impose area-based cutoffs to sort the worms and pillars. Typically, we  
104 find that the worms are approximately 2 orders of magnitude larger than pillars. Frame-to-  
105 frame tracking is done separately for these different objects with slightly different criteria for  
106 track persistence. Worm-objects are tracked between frames using their centroid, and the  
107 trajectory is terminated if the size changes dramatically (e.g. when a given worm encounters  
108 another worm or an air bubble). The centroids of pillar objects are identified, and tracks are

109 created for each pillar object, which we call pillar- object-track (POT). If a pillar in a particular  
110 frame is touching a worm, then the corresponding POT will have a gap at that point. Thus, the  
111 gap information in the pillar track determines the frames when the pillar was deflected and is  
112 used for deflection measurement. The rest of the frames are used for determination of pillar  
113 base location and radius. Thus, the POTs contain only the untouched pillars. This approach  
114 reduces the computation time significantly.

115 (iv) *Identification of approximate pillar coordinates in the arena.* Independent of steps (ii) – (iii),  
116 in parallel, we take the background image (main text **Fig. 2c**) and analyze it to identify the  
117 approximate coordinates of each pillar. Given that experimentally, the rows of pillars are  
118 slightly misaligned with respect to the image edge, here we also calculate the rotation angle for  
119 the background image to correct this misalignment.

120 To identify the approximate pillar coordinates, we apply the CHT, which finds the rims of pillars  
121 in the background image<sup>3</sup>. We note that implementing MATLAB's *imfindcircles* does not locate  
122 all the pillar rims, because it is optimized to find filled disks. In addition, as shown in the main  
123 text **Fig. 2h**, rather than having uniform thin-rimmed annuli, the pillar rims are somewhat like  
124 the Chinese Taijitu (i.e. Yin-Yang) symbol when being pushed hard by the worm. It is found that  
125 *imfindcircle* often fails to locate actual pillar rims in this case.

126 To address this issue, we implement the CHT where it looks for as many circles as it can with a  
127 given radius (user supplied) plus or minus 10% (main text **Fig. 2e**). Our own implementation is  
128 designed to find open rings in binary images. It works most robustly when rims of the circles in  
129 the image are at most 3 pixels thick, so a prior attenuation operation (either skeletonization or  
130 outlining) is done in each phase. We note that when the CHT checks for multiple radii this is  
131 computationally equivalent to running multiple passes checking for individual radii one at a  
132 time, so radii within the range are accurate up to a given resolution, which in this case will be  
133 1/2 pixel.

134 Our CHT implementation tries to find all possible rings, implying that some of them may not be  
135 actually rims of pillars. To eliminate the false pillar rims, we generate a grid based on user-  
136 defined spacing (see main text **Fig. 2h**). To align the grid onto the pillar-containing image, we  
137 check for rotation with respect to the viewpoint by taking the median of the angles between  
138 nearest neighbors. After rotation, the frame is translated by taking the medians of the x and y  
139 components of the difference between the generated grid points and their nearest found

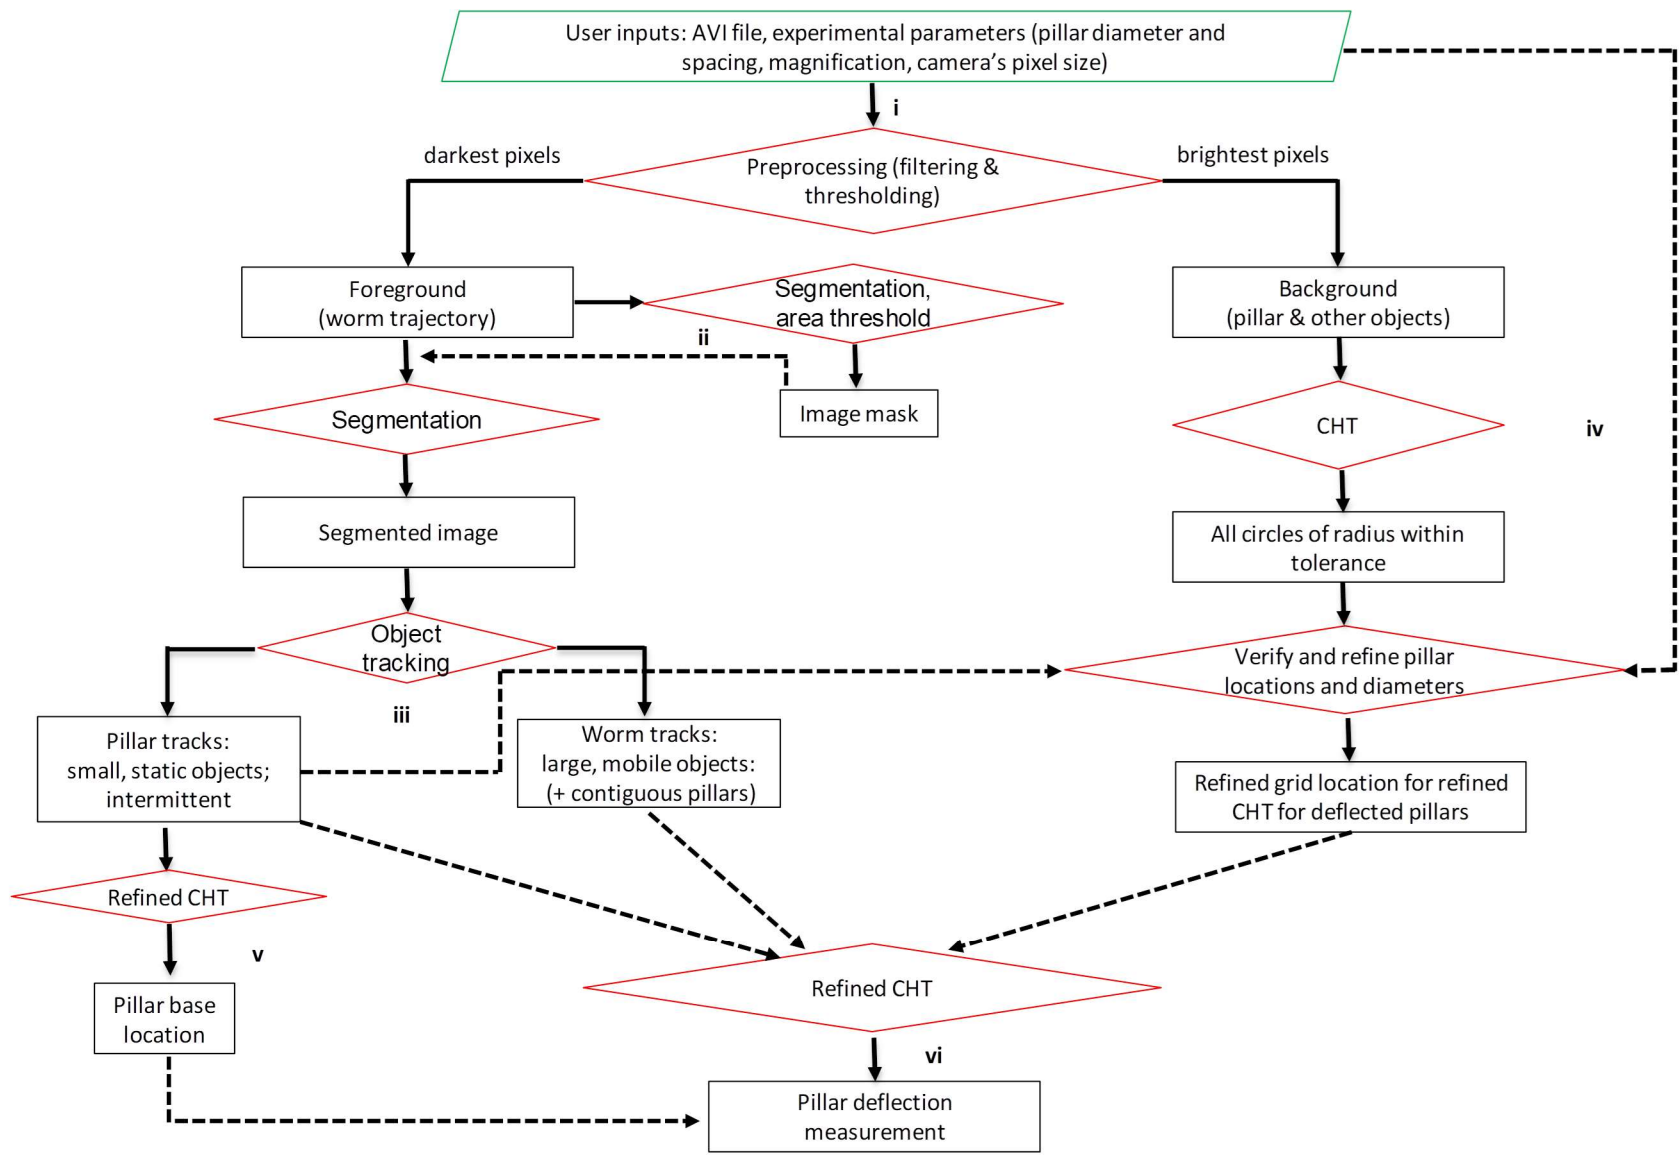

**Supplementary Figure 1. Work flow of pillar tracking algorithm.** The listed steps (i) – (vi) are described in Supplementary Note 1.

141 circles. Finally, we cross-reference the intersection points of the aligned grid with the centers of  
142 all possible rings and determine the rings that truly correspond with the pillars.

143 *(v) Determination of pillar base locations:* The pillar base locations are needed as a reference  
144 point to determine deflections. We do this by taking POTs from step (iii), which contain the  
145 undeflected pillars. These undeflected pillars are verified by checking their centroids against the  
146 grid locations (main text **Fig. 2g**) as well as checking for general shape conformance to a circle.  
147 Since the POTs contain several instances of the same undeflected pillar, we only take a subset  
148 of frames that yield the best shape conformance. The center and pillar radius values are  
149 evaluated for pillars that satisfy the grid positions and the best shape conformance. This  
150 refining is done using the CHT, this time in single-circle multi-radius mode on a small subframe  
151 containing the pillar-object.

152 We note that when we apply the CHT, the pillar rims are reduced to 2-3 pixels lining the interior  
153 of the rim (see main text **Fig. 2i**), since of all the alternatives available this corresponds most  
154 closely to the actual pillar extents. If we do not perform this attenuation operation, the radius  
155 value is too large since shadowing is more extensive outside than inside the pillar.

156 In general, we find that our videos contain at least one image where the undeflected states of  
157 an interacting pillar is captured, allowing us to accurately determine the pillar base location (as  
158 described above). In some rare instances, we may not have the untouched location of an  
159 interacting pillar, for example, if the worm touches the pillar in question during every frame of  
160 the movie. Although, it is possible to approximate the base location for such pillars using the  
161 base location of neighbouring pillar and array geometry, the deflections of these pillars are not  
162 considered in the analysis.

163 *(vi) Pillar deflection measurements:* To measure the deflections, the worm-objects that have  
164 contiguous pillars are taken (from the images that correspond to the gaps in POTs), and a  
165 single-circle, single-radius CHT is applied in a box with sides approximately twice the base  
166 diameter centered on the base location. We note that the attenuation operation, similar to the  
167 detection of untouched pillar base location, is also applied here.

168 In some instances, we do observe large deflections of the pillars, in which case the interior  
169 region of the pillar is more of an ellipse rather than a circle. Even in this case, the CHT works  
170 (main text **Fig 2j**) because the exterior perimeter in the direction of deflection will give a fairly  
171 trustworthy view of the actual pillar circumference since the shadowing is all on the inside of  
172 the pillar image (caused by light scattering due to the rounded sides of the pillar). In the other  
173 direction, the shadowing is blocked by the worm's body, but the pillar itself is hard enough to  
174 press into the worm without being noticeably deformed. Due to tilt the actual shape is an  
175 ellipse, but the eccentricity is low enough that the CHT still finds a circle using the base radius.

176 *Interaction of animals with sidewalls of pillar chamber and its effect on strength ( $f_{95}$ ):* We found  
177 that animals sometime prefer to interact with the side walls of the pillar arena. We observed  
178 that worms either (i) crawl along the wall and come back to the main arena in a continuous  
179 stroke (**Supplementary Figure 2a**), or (ii) move back and forth along the wall and spends longer  
180 duration along the wall (**Supplementary Figure 2b**), or (iii) try to make turns between the  
181 narrow space of the wall and the very first pillar from the wall (**Supplementary Figure 2c**). In  
182 case (i),  $f_{95}$  calculated for the frames where the worm body is touching the wall was found to be  
183 less than the  $f_{95}$  for the frames when the worm was not touching the wall (**Supplementary**  
184 **Figure 2d**). In case (ii),  $f_{95}$  could not be calculated as there was no frame available in which the  
185 worm did not touch pillars precluding us from determining the location of the pillar base. In case  
186 (iii), animal struggles to carry the whole body through the narrow space and the vector sum of  
187 the pillar forces is far from zero (> 10% of the total force generated by the worm) indicating  
188 animals exert significant forces on the walls. Thus, in evaluating  $f_{95}$  we censored those frames  
189 where worms were found to be interacting with the walls. We typically considered those pillar  
190 deflections where the animals were crawling approximately 300 - 500  $\mu\text{m}$  away from the side  
191 walls.

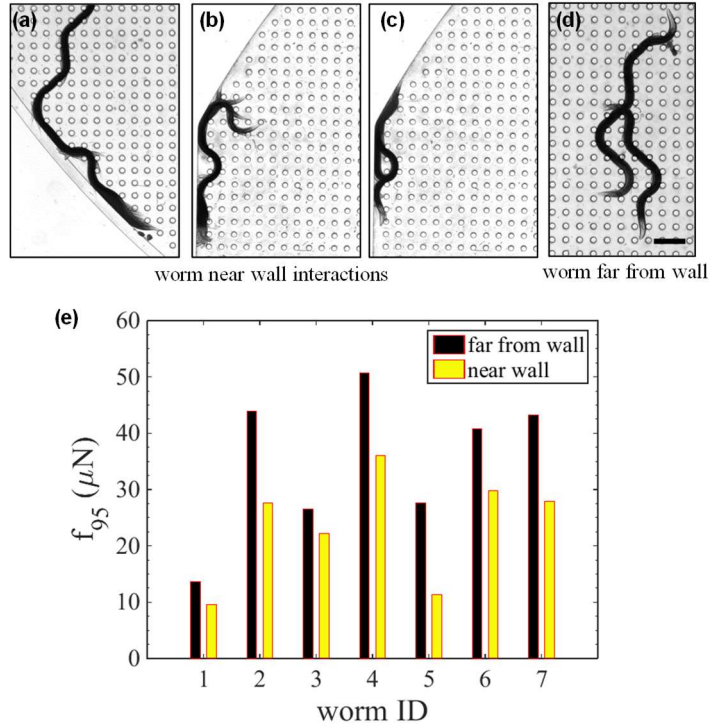

**Supplementary Figure 2. Wall effects on estimating strength measures.** *C. elegans* exhibit three types of interaction with the side wall of NemaFlex. Animal (a) crawl along the wall and come back to main arena in a continuous stroke (88 frames), (b) confused and move back and forth along the wall (64 frames), (c) try to make turns between the narrow space of the wall and the very first row of pillar from the wall ( 50 frames), and (d) worm crawling far from the wall (40 frames). Images are shown by overlaying min pixel intensity across all frame used. Scale bar 200  $\mu\text{m}$ . (e)The maximum exertable force ( $f_{95}$ ) calculated when the worms are far from the wall is consistently higher than the case when the worms interact with the walls.

192

193 **Supplementary Note 2: Validity of the force-deflection expression**

194 In the NemaFlex device, the forces exerted by *C. elegans* on the pillars are estimated using the  
 195 elastic Timoshenko beam deflection model<sup>4</sup>,

196

197 
$$F = k\Delta = \frac{\Delta}{\left(\frac{l^3}{3EI} + \frac{a^2(1+\gamma)l}{4EI} + \frac{l^2(h-l)}{2EI}\right)} \quad (1)$$

198

199 where  $\Delta$  is the deflection and  $k$  is the stiffness of the micropillar. The definitions of parameters  
 200 in  $k$  are described in the main text.

201 The accuracy of the force calculation depends on the following factors: (i) aspect ratio of the  
 202 pillar, *i.e.* ratio of height to diameter, (ii) magnitude of pillar deflection, (iii) constitutive law for  
 203 the material used to fabricate pillars which is influenced by loading rate, and (iv) location where



204 the force is applied on the pillar. Below we discuss the impact of each of these factors on our  
205 force analysis.

206 (i) *Pillar aspect ratio*. For slender micropillars of aspect ratio  $> 10$ , the Euler beam theory can be  
207 used to calculate the forces. However, for pillars of low aspect ratio, the bending due to shear  
208 needs to be considered as well. The pillars in the NemaFlex device that have been used  
209 predominantly in the study have a diameter of  $a = 38.3 \pm 0.4 \mu\text{m}$  and  $h = 71.8 \pm 2.9 \mu\text{m}$ , giving  
210 an aspect ratio of  $1.9 \pm 0.08$ . Due to this low aspect ratio we have used the Timoshenko beam  
211 theory to calculate the forces from deflected pillars. In a recent study, Du *et al.* have shown that  
212 for pillars of aspect ratio 1.6, Euler beam theory overestimates forces by as much as 29.3 %,  
213 whereas Timoshenko beam theory predictions are within 5% of the experimental data<sup>5</sup>.

214 (ii) *Magnitude of pillar deflection*. The extent of pillar displacements in our study typically vary  
215 from,  $\Delta/h = 2.5\text{-}19.3\%$ . Xiang and LaVan and Lin *et al.* have investigated behavior of low aspect  
216 ratio PDMS pillars across a wide range of deflections,  $\Delta/h = 0 - 70\%$ <sup>6,7</sup>. They showed that the  
217 predictions from the Timoshenko model are within 10% when  $\Delta/h \leq 20\%$ . Thus, using Eqn. (1)  
218 does not contribute large errors, even though the pillars in our study are of low aspect ratio and  
219 undergo reasonably large deflections.

220 We also tested the validity of the Timoshenko beam relation to the experimental data of PDMS  
221 pillar displacement reported by Khare *et al.*, in which they focused on measuring forces  
222 generated by *C. elegans*<sup>8</sup>. The authors directly obtained the force-deflection relation by  
223 measuring micropillar displacement as a function of applied force by using a FemtoTools force  
224 sensor. The PDMS pillars were of aspect ratio 3 and the deflection range was  $\Delta/h = 0 - 33\%$ . As  
225 shown in **Supplementary Figure 3a**, their data fits well to Eqn. (1).

226 (iii) *Constitutive law*. In this study, we assume that the PDMS pillars are elastic, i.e. the rate at  
227 which the nematode pushes the pillars does not influence our force estimates. However,  
228 depending on the loading rate, PDMS can be a viscoelastic material<sup>9</sup>. In the study by Lin *et al.*,  
229 they showed that when the loading rate is varied from 1.33 – 133  $\mu\text{m}/\text{sec}$ , both the elastic and  
230 viscoelastic Timoshenko beam theory agree within a margin of 5% error for a deflection range  
231 of  $\Delta/h = 0\text{-}10\%$ <sup>5</sup>. In our experiments, *C. elegans* push the pillars at a very small loading rate of  
232 0.2 – 2.26  $\mu\text{m}/\text{sec}$ , and the corresponding deflections are less than 20 %. Therefore, the elastic  
233 Timoshenko beam model suffices for our force analysis<sup>5,10</sup>.

234 The PDMS modulus value used in this study is  $E = 2.6 \text{ MPa}$ , which was obtained from literature<sup>9,</sup>  
235 <sup>11,12</sup>. The procedure used in our work to fabricate the PDMS pillars is very similar to that used in  
236 these prior studies suggesting this value is an appropriate choice. Any error in estimating  $E$  does  
237 not alter the trends reported in this study.

238 (iv) *Point of force application*. An important consideration in the force calculation is the choice  
239 of where exactly on the pillar the worm is applying its load, denoted by the parameter  $l$  in Eqn.

240 (1). Assuming the applied force is a point load, one obvious choice is that the load is being  
241 applied from the center of the worm body width as shown in **Supplementary Figure 3b** as  
242 option I. The second choice is that the load is being exerted at the center of the projected area  
243 that the worm body presses against the pillar, shown as option II in **Supplementary Figure 3b**.  
244 For the two choices, the estimated forces vary by 17% for L4 and 26% for the fully developed  
245 worms.

246 In this study, we used option II since experimentally we observe that force applied on the pillar  
247 by the worm causes local deformation in the worm body, and the contact force appears to be  
248 distributed across the worm cuticle. Moreover, when using option I, we find that in some cases  
249  $l > h$ , making it unphysical in the sense that the location where the load is being applied is not  
250 actually on the pillar.

251 In summary, considering all the factors that might influence the accuracy of force calculation,  
252 Eqn. (1) is a reasonable choice for determining forces from the pillar deflections for the  
253 micropillar geometry used in our study. Any inaccuracies will propagate the error, however, the  
254 trends we report will remain unchanged since the same analysis procedure was used in the  
255 entire study.

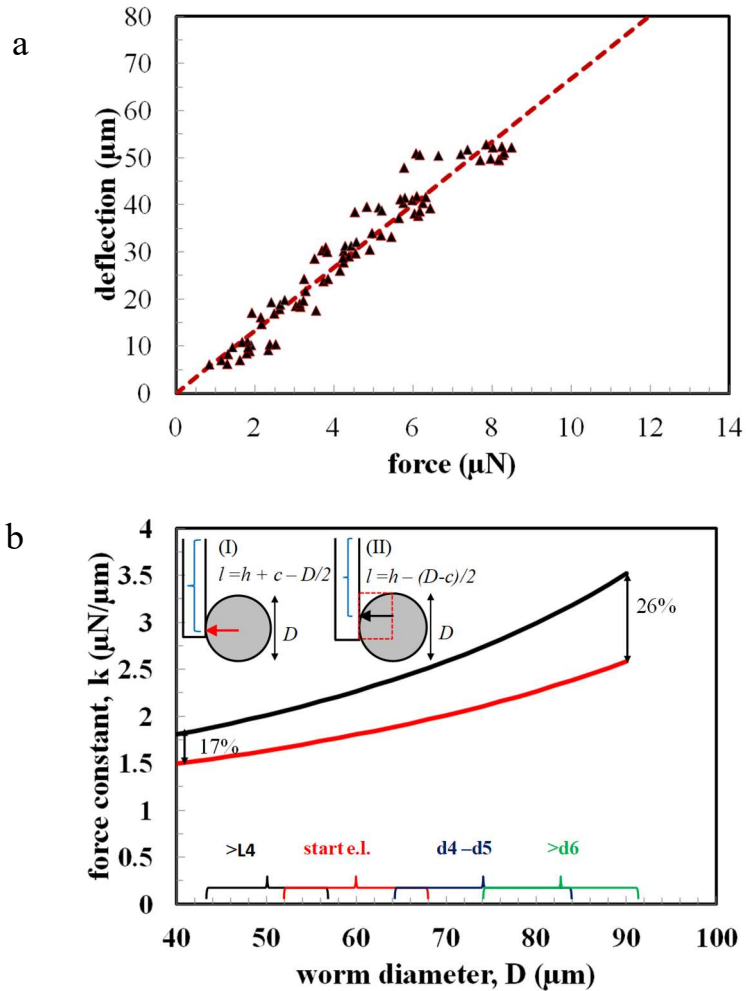

**Supplementary Figure 3. Suitability of Timoshenko beam deflection theory to estimate pillar forces.** (a) Timoshenko beam deflection theory estimates reaction forces from a PDMS micropillar with good agreement for deflections created artificially with a FemtoTools© force sensor. Each scatter symbol represents a deflection caused by a FemtoTools© force sensor using known force. Data is from the literature<sup>8</sup>. The line represents the elastic Timoshenko model (Equation 1). Pillar dimensions are  $a = 50 \pm 0.58 \mu\text{m}$ ;  $h = 153 \pm 5.24 \mu\text{m}$ ;  $s = 70 \pm 0.58 \mu\text{m}$  and point of the load is  $25 \mu\text{m}$  above from the tip of the pillar. (b) Timoshenko beam deflection theory is sensitive to the assumption of point where the load is applied. Solid lines in red and black represent the force for unit deflection calculated using the two different options illustrated in the inset. In this study option II has been used. The worm diameter considered here ranges from L4 to fully developed worms (e.l. indicates egg laying.)

256  
257  
258  
259  
260  
261

### 262 **Supplementary Note 3: Design considerations for the micropillar arena**

263 The main considerations for designing the micropillar arena are to (i) match closely the crawling  
264 gait (wavelength and amplitude) of *C. elegans* on agar, (ii) maximize the number of pillars  
265 deflected by the worm body, and (iii) accommodate the limits imposed by the elastic  
266 Timoshenko beam deflection theory.

267 Our worms of interest for muscle strength measurement were L4 (46-50 hrs,  $D = 50-55 \mu\text{m}$ ,) to  
268 young adult (60-65 hrs old,  $D = 58-67 \mu\text{m}$ ). We ensured that the diameter of the pillars was not  
269 too small such that significant deflections occurred violating the limits of Timoshenko beam  
270 deflection theory. Likewise, designing too large a diameter of pillars makes the pillars so stiff  
271 that the deflections are rather small and below the camera resolution. Pillars of diameter  $a = 50$   
272  $\mu\text{m}$  were used in previous force measurement assays and the maximum reported force was 35  
273  $\mu\text{N}^{11, 13}$ . The deflection equivalent to this amount of force is (for a 50  $\mu\text{m}$  diameter pillar) within  
274 the limit of Timoshenko beam deflection model as well as the camera resolution. As a result, in  
275 this study, we explored pillars with  $a \approx 40 - 60 \mu\text{m}$ .

276 The edge-to-edge spacing between pillars ( $s$ ) was designed such that the nematodes could  
277 crawl freely without getting stuck. To quantify the degree of free space available for the  
278 nematode to crawl, we define a confinement parameter  $D/s$ . Smooth crawling for day 3 young  
279 adult *C. elegans* was reported by Albrecht *et al.* in an arena containing non-deformable pillars  
280 with  $a = 200 \mu\text{m}$  and a confinement  $D/s = 0.58^{14}$ . Initial trials showed that a device with this  
281 level of confinement produced forces that are too small, and the animals are not challenged  
282 enough to push the pillars.

283 Using the above heuristics, we tested a microfluidic device that contained a composite arena  
284 with three levels of confinement due to the distinct pillar regions A1, A2, and A3. The pillar  
285 dimensions and confinements for each of the pillar regions are listed in **Supplementary Table 1**.  
286 The crawling amplitude  $A$  and wavelength  $\lambda$  of young adults crawling on agar have been  
287 reported to be  $100 \pm 10$  and  $830 \pm 20 \mu\text{m}$  respectively<sup>15</sup>. The data in **Supplementary Table 1**  
288 shows that in the composite arena the amplitude is similar to that of agar, but the wavelength  
289 is reduced significantly. Yet, we observe that the animals are able to crawl without getting  
290 physically immobilized. Similar observations were made by Albrecht *et al.* who reported  
291 crawling wavelength of 520  $\mu\text{m}$  and amplitude 150  $\mu\text{m}$  for an adult worm in their non-  
292 deformable micropillar arena<sup>14</sup>. Thus, the nematodes are able to crawl without getting stuck  
293 even in arena A3, which has the strongest confinement of 1.16. However, the crawling velocity  
294 is reduced in arena A3 suggesting that this micropillar geometry provides a stronger physical  
295 challenge to the worm compared to the A2 and A1 arenas.

296

297

298 **Supplementary Note 4: Average force value does not reliably capture *C. elegans* muscle**  
299 **strength.**

300 Past studies have used an average force value as the metric to report the voluntary forces that  
301 *C. elegans* exerted on the interacting pillars. Here  $f_{avg}$  is defined as the average force registered  
302 per pillar, which is then averaged over all frames<sup>8</sup>. To check the reliability of  $f_{avg}$  in scoring *C.*  
303 *elegans* muscle strength, we used the same force data (for both WT and *unc-112*) that has been  
304 used in **main text, Fig. 8**. We found that the slope is consistently lower than unity for wild type  
305 between the arenas for wild type as shown in **Supplementary Fig. 4a,b**. Coefficient of  
306 determination ( $r^2$  value) is negative for WT in the region A1 and A3. Also,  $r^2$ -value is negative for  
307 *unc-112* in both A1 and A2 when compared to A3 as shown in the table of **Supplementary Fig. 4**  
308 indicating that the  $f_{avg}$  in different arenas do not correlate well and therefore are inconsistent  
309 metrics of muscle strength.

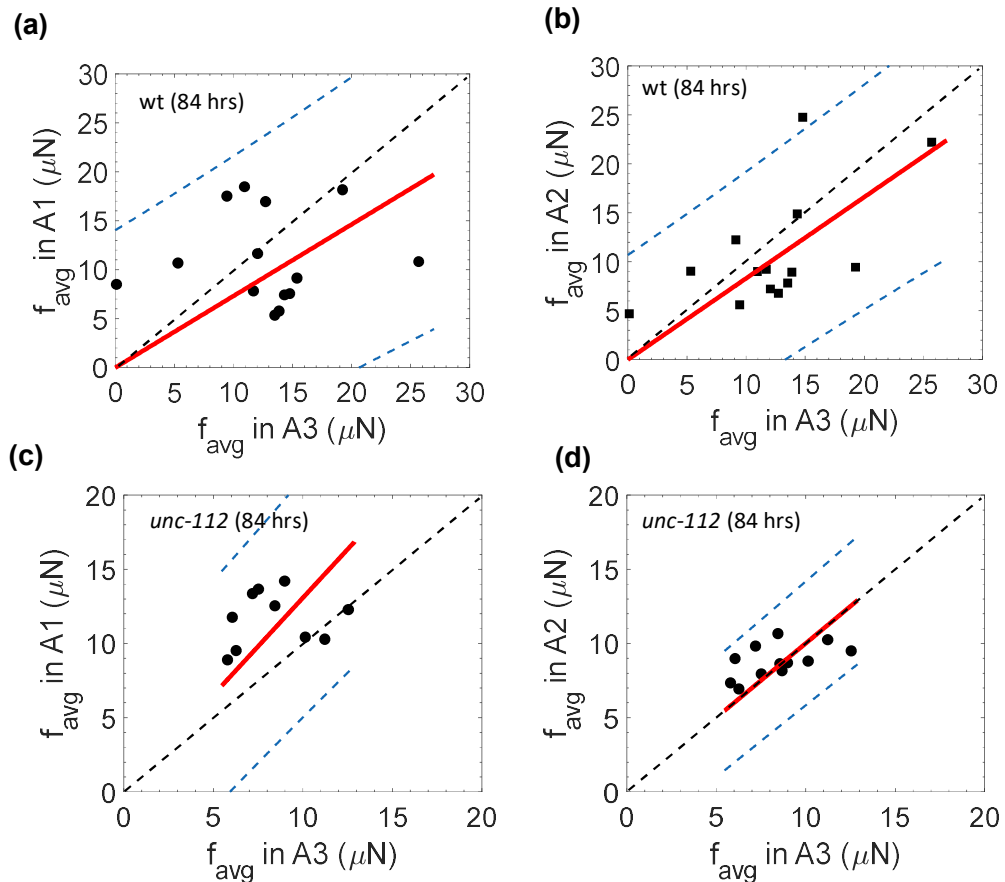

| y = mx         |            |             |                |
|----------------|------------|-------------|----------------|
| Genotype       | Comparison | Slope, m    | R <sup>2</sup> |
|                |            | mean ± s.e  |                |
| WT             | A1 vs A3   | 0.73 ± 0.14 | -9.1           |
|                | A2 vs A3   | 0.83 ± 0.11 | 0.3            |
| <i>unc-112</i> | A1 vs A3   | 1.3 ± 0.14  | -2.35          |
|                | A2 vs A3   | 1.0 ± 0.07  | -1.55          |

310

311

312 **Supplementary Figure 4. Average force value is not a reliable measure of *C. elegans* muscle**  
 313 **strength in pillar arena.** A comparison between average exertable force measured for WT  
 314 individuals in (a) section A1 and section A3, n= 14 and (b) in section A2 and section A3, n= 14.  
 315 Similar comparison is shown for *unc-112* animals (n = 13 animals) in (c) and (d). The red line is  
 316 the best-fit curve to the data, and the dashed black represents (slope of 1 and zero intercept).  
 317 The blue lines demarcate the 95% confidence interval region. Bottom table shows the slope and  
 318 coefficient of determination of the fit between pair of sections.

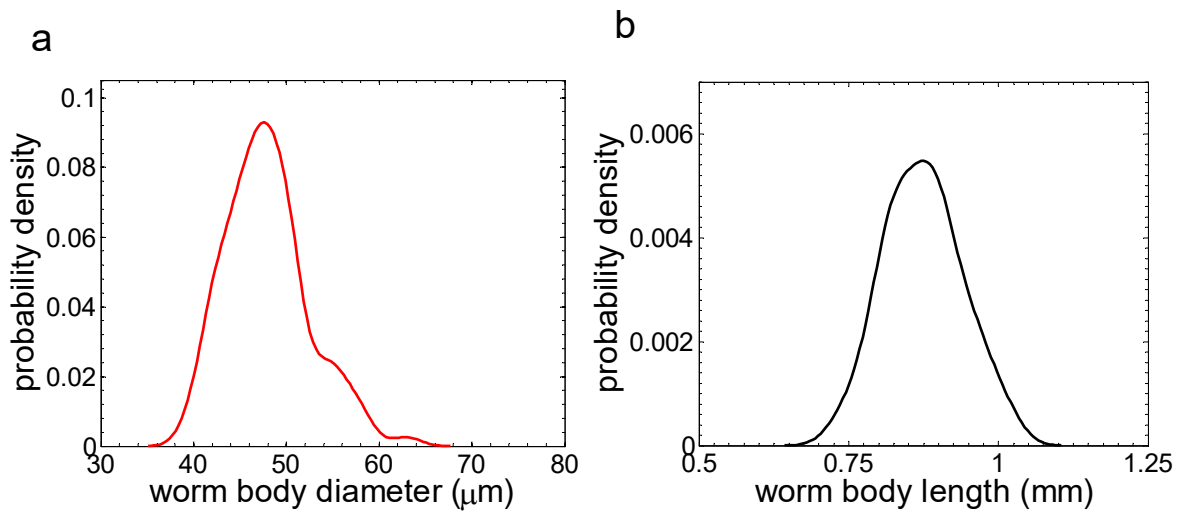

319

320 **Supplementary Figure 5. Size distribution of synchronized (young adult) wild-type population.**

321 Worms grow with a wide range of sizes during the same developmental period. (a) Distribution  
322 of the worm body diameter of age-synchronized young adults,  $n=98$ . (b) Distribution of worm  
323 lengths from the same population as in (a). Worms were grown on agar plate at  $20^{\circ}\text{C}$  with  
324 sufficient food.

325

326

327

328

329

330

331

332

333

334

335

336

337

338

339 **Supplementary Table 1. Estimates of default pillar deflection and forces due to the nematode**  
 340 **body size being greater than the gap between pillars.**

| Arena type        | Pillar diameter,<br>$a$ $\mu\text{m}$ | Worm diameter,<br>$D$ $\mu\text{m}$ | Pillar spacing,<br>$s$ $\mu\text{m}$ | Confinement,<br>$D/s$ | Default deflection,<br>$\Delta = (s - D)/2$ $\mu\text{m}$ | Force equivalent to the<br>deflection, $F$ $\mu\text{N}$ |
|-------------------|---------------------------------------|-------------------------------------|--------------------------------------|-----------------------|-----------------------------------------------------------|----------------------------------------------------------|
| Composite<br>(A3) | 44.1                                  | 64.0                                | 55.9                                 | 1.15                  | 4.1                                                       | 11.5                                                     |
|                   | 44.1                                  | 60.0                                |                                      | 1.07                  | 2.1                                                       | 5.5                                                      |
|                   | 44.1                                  | 56.0                                |                                      | 1.00                  | 0.1                                                       | 0.1                                                      |
| NemaFlex          | 38.3                                  | 70.0                                | 61.7                                 | 1.13                  | 4.2                                                       | 8.2                                                      |
|                   | 38.3                                  | 66.0                                |                                      | 1.07                  | 2.2                                                       | 4.0                                                      |
|                   | 38.3                                  | 62.0                                |                                      | 1.00                  | 0.1                                                       | 0.3                                                      |

341  
342  
343  
344  
345  
346  
347  
348  
349  
350  
351  
352  
353  
354  
355  
356  
357  
358  
359  
360  
361  
362



363 **Supplementary Table 2. Summary of prior works that investigated the influence of pillar arena geometry on *C. elegans* locomotive**  
 364 **behavior and force generation. The full citation of the references mentioned here are provided in the main text.**

| Focus area              | Pillar diameter $a$ , $\mu\text{m}$ | Pillar spacing (center -center) $S_0$ , $\mu\text{m}$ | Gap between pillars $S=(S_0-a)$ , $\mu\text{m}$ | worm diameter $D$ , $\mu\text{m}$ | Pillar arrangement | Worm confinement ( $D/S$ ) | Frequency $f$ , Hz | Amplitude $A$ , $\mu\text{m}$ | Wavelength $\lambda$ , $\mu\text{m}$ | speed $v$ , mm/s | reference |
|-------------------------|-------------------------------------|-------------------------------------------------------|-------------------------------------------------|-----------------------------------|--------------------|----------------------------|--------------------|-------------------------------|--------------------------------------|------------------|-----------|
| Locomotion/<br>behavior | 100                                 | 160-200                                               | 60                                              | 80                                | Hexagonal          | 1.33                       | -                  | -                             | 400 – 600                            | 0.14 ± 0.017     | ref.35    |
|                         | 200                                 | 260-300                                               | 80                                              |                                   |                    | 1                          |                    |                               |                                      |                  |           |
|                         | 500                                 | 560-600                                               | 100                                             |                                   |                    | 0.8                        |                    |                               |                                      |                  |           |
|                         | 300                                 | 350-550                                               | 50 - 250                                        | 60                                | Square             | 0.24 - 1.2                 | 1.92 ± 0.08        | -                             | 650 ± 40                             | > 1.3            | ref.36    |
|                         | 200                                 | 300                                                   | 100                                             | 60                                | Hexagonal          | 0.6                        | -                  | 150.00                        | 500.00                               | 0.20             | ref.37    |
|                         | 350                                 | 430-700                                               | 80 - 350                                        | 60                                | Square             | 0.75 - 0.17                | 1.5 - 2            | -                             | -                                    | 0.1 -0.35        | ref.38    |
| Force                   | 40                                  | 100                                                   | 60                                              | 80                                | Square             | 1.33                       | -                  | -                             | -                                    | -                | ref.22    |
|                         | 60                                  | 110 - 140                                             | 50 - 80                                         | 80                                | Square             | 1.0-1.6                    | 0.15 - 0.45        | 150 -300                      | 350 -600                             | 0.06             | ref.23    |
|                         |                                     |                                                       |                                                 | 80                                | Hexagonal          |                            |                    |                               |                                      | 0.15             |           |
|                         | 50                                  | 120                                                   | 70                                              | 60                                | Hexagonal          | 0.86                       | -                  | -                             | -                                    | -                | ref.24    |
| 40                      | 100                                 | 60                                                    | 51 - 70                                         | Square                            | 0.85 - 1.15        | 0.21±0.03                  | 84.8 ± 18.4        | 455.6 ± 45.3                  | 0.13 ± 0.05                          | NemaFlex         |           |

365

366

367 **Notes and references**

- 368 1. N. Otsu, *IEEE Transactions on Systems, Man, and Cybernetics*, 1979, **9**, 62-66.
- 369 2. R. M. Haralick and G. S. Linda, *Computer and Robot Vision*, Addison-Wesley, Boston,  
370 1992.
- 371 3. D. H. Ballard, *Pattern Recognition*, 1981, **13**, pp. 111-122.
- 372 4. S. Timoshenko and J. M. Gere, *Mechanics of Materials*, Van Nostrand Reinhold Co., New  
373 York, New York, 1972.
- 374 5. P. Du, I. Lin, H. Lu and X. Zhang, *Journal of Micromechanics and Microengineering*, 2010,  
375 **20**.
- 376 6. Y. Xiang and D. LaVan, *Applied Physics Letters*, 2007, **90**.
- 377 7. I. Lin, Y. Liao, Y. Liu, K. Ou, K. Chen and X. Zhang, *Applied Physics Letters*, 2008, **93**.
- 378 8. S. Khare, A. Awasthi, V. Venkataraman and S. Koushika, *Biomicrofluidics*, 2015, **9**,  
379 014111.
- 380 9. F. Schneider, T. Fellner, J. Wilde and U. Wallrabe, *Journal of Micromechanics and*  
381 *Microengineering*, 2008, **18**.
- 382 10. P. Du, X. Zheng, I. Lin and X. Zhang, *Applied Physics Letters*, 2011, **99**.
- 383 11. A. Ghanbari, V. Nock, S. Johari, R. Blaikie, X. Chen and W. Wang, *Journal of*  
384 *Micromechanics and Microengineering*, 2012, **22**, 095009.
- 385 12. X. Liu, Y. Sun, W. Wang and B. Lansdorp, *Journal of Micromechanics and*  
386 *Microengineering*, 2007, **17**, 1281-1288.
- 387 13. S. Johari, V. Nock, M. Alkasi and W. Wang, *Lab on a Chip*, 2013, **13**, 1699-1707.
- 388 14. D. Albrecht and C. Bargmann, *Nature Methods*, 2011, **8**, 599-605.
- 389 15. X. Shen, J. Sznitman, P. Krajacic, T. Lamitina and P. Arratia, *Biophysical Journal*, 2012,  
390 **102**, 2772-2781.

391
